# Supplementary material for: Understanding Stakeholder Views Regarding the Design of an Intervention Trial to Reduce Anticholinergic Burden: A Qualitative Study
Source: Frontiers journal article supplement (doi:10.3389/fphar.2021.608208), 2021-11-12
Supplement: Data_Sheet_1.PDF [file Data_Sheet_1.PDF]

# We're looking for discussion group participants!

**TOPIC:** Reducing/changing certain medications which can have side effects.

**WHO?** We're looking for older adults (age 65+) who take two or more of the medications listed overleaf to share their experiences of taking the medications and their views on stopping or changing them.

**WHAT?** Participants are asked to spend an hour and a half in a discussion group about the topic. Travel expenses will be paid.

**WHY DO IT?** By taking part, you can help to benefit people using such medicines in future. You will also receive a £50 gift voucher as a thank you.

Want to know more?

Then ring Yvonne Cunningham at:

**0141 330 2041** or

email: [yvonne.cunningham@glasgow.ac.uk](mailto:yvonne.cunningham@glasgow.ac.uk)

The research is being carried out by researchers in the Institute of Health & Wellbeing at the University of Glasgow and is funded by the Chief Scientists Office.

If you are aged over 65 and are taking two or more of any of the following medicines, then we would like to talk to you! Please contact Karen Wood at 0141 3302816 or [karen.wood@glasgow.ac.uk](mailto:karen.wood@glasgow.ac.uk)

#### **Antihistamines**

Allegra  
Allercalm  
Allerief  
Atarax  
Avomine  
Benadryl Allergy  
Cetirizine  
Chlorphenamine  
Clarityn  
Fexofenadine  
Hayleve  
Hydroxyzine  
Loratadine  
Phenergan  
Piriteze  
Piriton  
Promethazine  
Sominex  
Telfast  
Zirtek

#### **Diuretic/Water Tablets**

Diumide-K Continus  
Frumil  
Frusene  
Furosemide  
Lasilactone  
Lasix

#### **Stomach or Indigestion medications**

Cimetidine  
Ranitidine  
Tagamet  
Zantac  
Zantac 75  
Zantac 75 Relief

#### **Bladder medications**

Cystrin  
Detrusitol  
Detrusitol  
Ditropan  
Kentera  
Lyrinel XL  
Oxybutynin  
Solifenacin  
Tolterodine  
Vesicare

#### **Pain Relief medications**

Amitriptyline  
Carbagen  
Carbamazepine (also for epilepsy)  
Co-codamol  
Codeine  
Co-dydramol  
Desyrel  
Dihydrocodeine  
Elavil  
Endep  
Kapake  
Molipaxin  
Paramol  
Remedeine  
Solpadol  
Tegretol  
Tegretol XR  
Trazodone  
Triptafen  
Trittico  
Tylex  
Vanatrip

#### **Blood Thinners/Anti-coagulants**

Warfarin

#### **Irritable bowel /Anti-diarrhoeal/ Motion sickness medications/Labyrinthitis/Nausea /Vomiting**

Bentyl  
Buscopan  
Dicyclomine  
Dicycloverine  
Dioraleze  
Hyoscine  
Imodium  
Loperamide  
Merbentyl  
Pro-Banthine  
Propantheline  
Scopolamine

#### **Anti-depressant medications**

Cipralext  
Cipramil  
Citalopram  
Escitalopram  
Fluoxetine  
Lustral  
Mirtazapine  
Oxactin  
Paroxetine  
Prozac  
Seroxat  
Sertraline  
Zispin SolTab
